# Supplementary material for: Regular mesoporous nanoarchitectures with Fe-doped semiconducting framework and enhanced photocatalytic activity
Source: Royal Society of Chemistry journal article supplement (doi:10.1039/c000298b), 2010-01-01
Supplement: c000298b.pdf [file c000298b.pdf]

## Electronic Supplementary Information

### Regular mesoporous nanoarchitectures with Fe-doped semiconducting framework and enhanced photocatalytic activity

5 *Zhengxin Ding, Jianhui Huang, and Xincheng Wang\**

#### **Preparation**

A solution containing titanium tetraisopropoxide (TTIP) and concentrated HCl (37 %) was added into an ethanolic solution of the surfactant of Pluronic P123 (BASF Co.) and FeCl<sub>3</sub> in the molar ratio 10 of 1 TTIP: 0.001 FeCl<sub>3</sub>:15 ethanol: 0.01 P123: 1.6 HCl: 5.4 H<sub>2</sub>O. The mole ratio of Fe/Ti is 0.1 %. The mixture was stirred at 277 K for 1 h, and then used for coating glass/quartz slides. Alternatively, the powder sample could be prepared by transferring the mixture to a Petri dish and underwent solvent evaporation. Calcination was done by heating the sample at 673 K for 4 h (ramp: 1 K /min). Samples containing 0.2 %, 0.5 %, 1.0 % and 3.0 % of Fe(III) were prepared similarly.

15 A series of other metal doped ordered mesoporous TiO<sub>2</sub> (M/TiO<sub>2</sub>, M=Sn, Ni, Mn, Cr, Cu, Co, and Zn) was also fabricated by using this method. Precursors of the metals doped were their metal chlorides.

#### 20 **Activity Test**

The photocatalytic activity was measured by the degradation of organic dye of modern yellow 10 (MY10). A 300W tungsten halogen lamp was positioned inside a cylindrical Pyrex vessel and surrounded by a circulating water jacket (Pyrex) to cool it. 0.5 g of catalyst was suspended in a 500 ml aqueous solution of  $1.1 \times 10^{-4}$  M MY10. Air was bubbled into the solution throughout the experiment. 25 Prior to irradiation, the suspensions were stirred in the dark overnight. At given irradiation time intervals, 2 ml of sample was collected and then centrifuged to remove solids. The degraded MY10 solutions were analyzed by a Varian Cary 100 Scan UV/Visible spectrophotometer.

30

35

40

**Figure S1. wide-angle XRD patterns of mesoporous TiO<sub>2</sub> without iron, with 0.1% iron and 3.0% iron.**

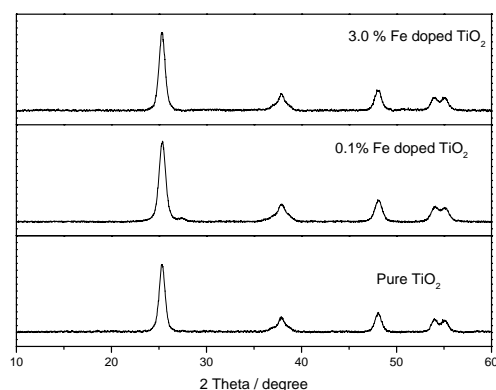

50

**Figure S2. N<sub>2</sub> adsorption-desorption isothermal (inset) and corresponding BJH pore-size distribution curve of a 0.1%Fe/TiO<sub>2</sub> sample. The pore-size distribution was determined from the desorption branch of the isothermal.**

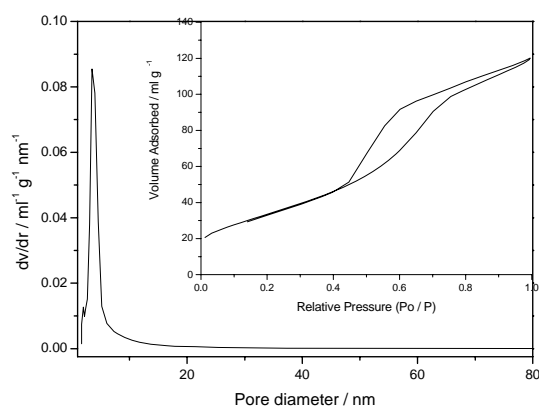

60

65

**Table S1. Effect of different iron cocentrations on the Pore-Wall Properties Obtained from N<sub>2</sub>-Sorption and XRD Results of the Mesoporous TiO<sub>2</sub>**

70

| sample              | S <sub>BET</sub> <sup>a</sup> | V <sup>b</sup>     | D <sub>BJH</sub> <sup>c</sup> |
|---------------------|-------------------------------|--------------------|-------------------------------|
| Fe/TiO <sub>2</sub> | m <sup>2</sup> /g             | cm <sup>3</sup> /g | nm                            |
| Pure                | 93.00                         | 0.1329             | 4.0261                        |
| 0.1%                | 116.66                        | 0.1812             | 4.3118                        |
| 0.2%                | 101.80                        | 0.2705             | 7.7485                        |
| 0.5%                | 103.80                        | 0.2290             | 6.6476                        |
| 1.0%                | 112.39                        | 0.2278             | 5.5975                        |
| 3.0%                | 101.89                        | 0.2183             | 6.5551                        |

BET surface area calculated from the linear part of the BET plot ( $(P/P_0) = 0.1-0.2$ ). <sup>b</sup> Total pore volume, taken from the volume of N<sub>2</sub> adsorbed at  $P/P_0 = 0.976$ . <sup>c</sup> Average pore diameter, estimated using the desorption branch of the isotherm and the Barrett-Joyner-Halenda (BJH) formula.

80 **Figure S3.** Low-angle XRD patterns of other metal doped ordered mesoporous TiO<sub>2</sub>. The molar ratio of metal/Ti is 0.1 %.

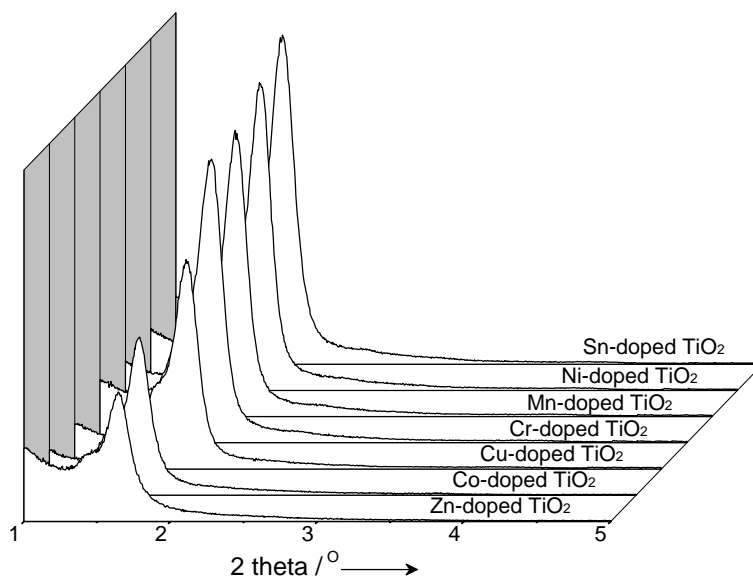

85 **Figure S4.** TEM images of the metal ion doped  $\text{TiO}_2$ . Metal/Ti=0.1 at.%. Bar=100 nm.

90

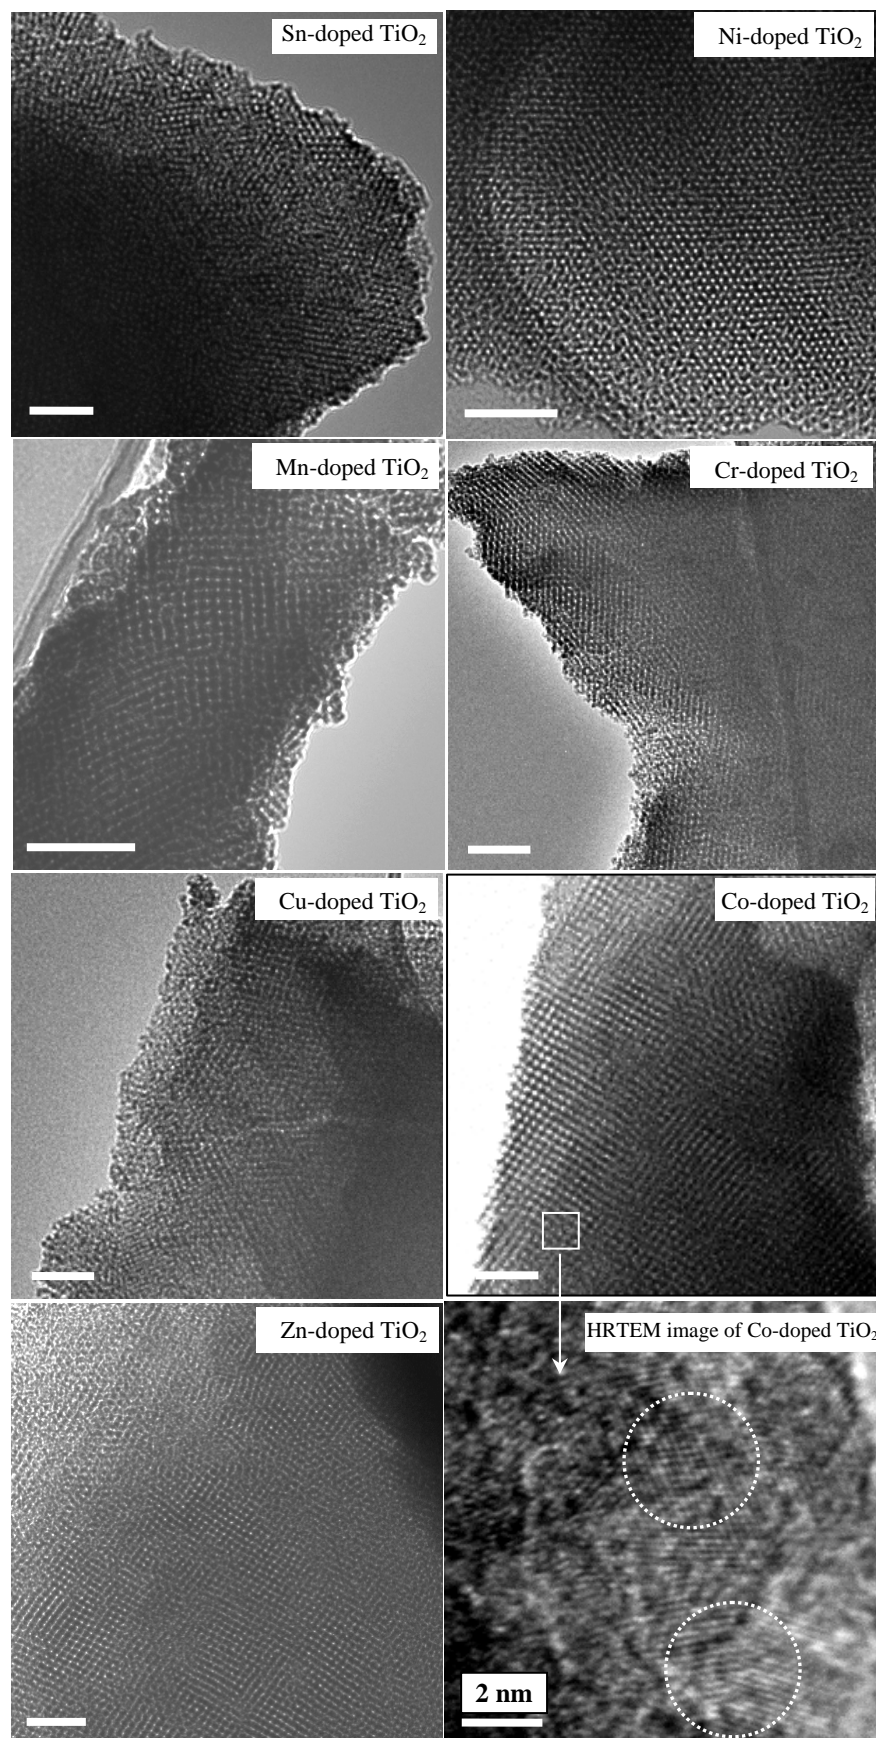

95

100

105
